# Supplementary material for: Vividly colorful hybrid perovskite solar cells by doctor-blade coating with perovskite photonic nanostructures
Source: Royal Society of Chemistry journal article supplement (doi:10.1039/c5mh00126a), 2015-01-01
Supplement: c5mh00126a1.pdf [file c5mh00126a1.pdf]

## Vivid Colorful Hybrid Perovskite Solar Cells by Doctor-Blade Coating with Perovskite Photonic Nanostructures

Yehao Deng, Qi Wang, Yongbo Yuan and Jinsong Huang\*

Department of Mechanical and Materials Engineering, University of Nebraska-

Lincoln, Lincoln, Nebraska 68588-0656, USA. [\\*jhuang2@unl.edu](mailto:*jhuang2@unl.edu)

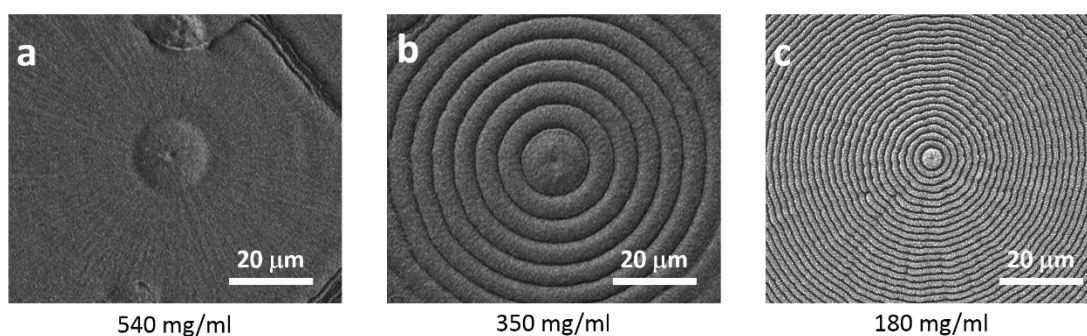

**Fig. S1. The precursor solution concentration dependent OTP film morphologies.**

(a)-(c) OTP film doctor bladed with precursor solution concentration of 540 mg/ml, 350 mg/ml, and 180 mg/ml.
